# Supplementary material for: The Effects of Medicare Accountable Organizations on Inpatient Mortality Rates
Source: PubMed Central journal article supplement — Inquiry. 2018 Sep 24;55:0046958018800092. doi: 10.1177/0046958018800092 (PMC6156189; doi:10.1177/0046958018800092), 2018-09-24
Supplement: Supplemental_Tables.pdf [file Supplemental_Tables.pdf]

**Supplemental Table 1.** Logistic Regressions of Hospital Inpatient Mortality among Admissions for AAA Repair: ACOs without Stratification.

| <b>Effect</b>          | <b>Level</b>          | <b>Odds Ratio:<br/>Point Estimate</b> | <b>Lower<br/>95%<br/>Confidence<br/>Limit</b> | <b>Upper<br/>95%<br/>Confidence<br/>Limit</b> | <b>P-value</b> |
|------------------------|-----------------------|---------------------------------------|-----------------------------------------------|-----------------------------------------------|----------------|
| <b>ACO in 2011</b>     |                       | 1.06                                  | 0.77                                          | 1.47                                          | 0.71           |
| <b>ACO in 2012</b>     |                       | 1.02                                  | 0.73                                          | 1.41                                          | 0.91           |
| <b>ACO in 2013</b>     |                       | 0.84                                  | 0.59                                          | 1.21                                          | 0.36           |
| <b>ACO in 2014</b>     |                       | 1.07                                  | 0.76                                          | 1.50                                          | 0.71           |
| <b>Sex × Age group</b> | <b>Male × 65-69</b>   | 1.00                                  |                                               |                                               |                |
|                        | <b>Male × 70-74</b>   | 1.22                                  | 1.06                                          | 1.40                                          | 0.01           |
|                        | <b>Male × 75-79</b>   | 1.26                                  | 1.10                                          | 1.45                                          | 0.00           |
|                        | <b>Male × 80-84</b>   | 1.78                                  | 1.55                                          | 2.05                                          | 0.00           |
|                        | <b>Male × 85+</b>     | 2.44                                  | 2.11                                          | 2.83                                          | 0.00           |
|                        | <b>Female × 65-69</b> | 1.58                                  | 1.28                                          | 1.96                                          | 0.00           |
|                        | <b>Female × 70-74</b> | 1.88                                  | 1.57                                          | 2.26                                          | 0.00           |
|                        | <b>Female × 75-79</b> | 2.22                                  | 1.88                                          | 2.62                                          | 0.00           |
|                        | <b>Female × 80-84</b> | 3.08                                  | 2.63                                          | 3.62                                          | 0.00           |
|                        | <b>Female × 85+</b>   | 4.04                                  | 3.42                                          | 4.79                                          | 0.00           |
| <b>Intercept</b>       |                       | 0.02                                  | 0.02                                          | 0.03                                          | 0.00           |
| <b>Year</b>            | <b>2008</b>           | 1.60                                  | 1.39                                          | 1.83                                          | 0.00           |
|                        | <b>2009</b>           | 1.45                                  | 1.27                                          | 1.67                                          | 0.00           |
|                        | <b>2010</b>           | 1.43                                  | 1.24                                          | 1.64                                          | 0.00           |
|                        | <b>2011</b>           | 1.20                                  | 1.04                                          | 1.39                                          | 0.01           |
|                        | <b>2012</b>           | 1.19                                  | 1.03                                          | 1.37                                          | 0.02           |
|                        | <b>2013</b>           | 1.11                                  | 0.96                                          | 1.29                                          | 0.16           |
|                        | <b>2014</b>           | 1.00                                  |                                               |                                               |                |

Notes: ACO = Accountable Care Organization; AAA = abdominal aortic aneurysm. Hospital-specific coefficients not shown.

**Supplemental Table 2.** Logistic Regressions of Hospital Inpatient Mortality among Admissions for CABG: ACOs without Stratification.

| <b>Effect</b>          | <b>Level</b>          | <b>Odds Ratio:<br/>Point Estimate</b> | <b>Lower<br/>95%<br/>Confidence<br/>Limit</b> | <b>Upper<br/>95%<br/>Confidence<br/>Limit</b> | <b>P-value</b> |
|------------------------|-----------------------|---------------------------------------|-----------------------------------------------|-----------------------------------------------|----------------|
| <b>ACO in 2011</b>     |                       | 1.07                                  | 0.91                                          | 1.27                                          | 0.40           |
| <b>ACO in 2012</b>     |                       | 0.79                                  | 0.65                                          | 0.95                                          | 0.01           |
| <b>ACO in 2013</b>     |                       | 0.81                                  | 0.67                                          | 0.98                                          | 0.03           |
| <b>ACO in 2014</b>     |                       | 1.12                                  | 0.94                                          | 1.32                                          | 0.20           |
| <b>Sex × Age group</b> | <b>Male × 65-69</b>   | 1.00                                  |                                               |                                               |                |
|                        | <b>Male × 70-74</b>   | 1.43                                  | 1.34                                          | 1.54                                          | 0.00           |
|                        | <b>Male × 75-79</b>   | 1.89                                  | 1.77                                          | 2.02                                          | 0.00           |
|                        | <b>Male × 80-84</b>   | 2.60                                  | 2.42                                          | 2.80                                          | 0.00           |
|                        | <b>Male × 85+</b>     | 3.40                                  | 3.10                                          | 3.74                                          | 0.00           |
|                        | <b>Female × 65-69</b> | 1.58                                  | 1.45                                          | 1.71                                          | 0.00           |
|                        | <b>Female × 70-74</b> | 2.07                                  | 1.91                                          | 2.23                                          | 0.00           |
|                        | <b>Female × 75-79</b> | 2.88                                  | 2.68                                          | 3.10                                          | 0.00           |
|                        | <b>Female × 80-84</b> | 3.71                                  | 3.44                                          | 4.00                                          | 0.00           |
|                        | <b>Female × 85+</b>   | 4.30                                  | 3.87                                          | 4.77                                          | 0.00           |
| <b>Intercept</b>       |                       | 0.02                                  | 0.02                                          | 0.02                                          | 0.00           |
| <b>Year</b>            | <b>2008</b>           | 1.14                                  | 1.06                                          | 1.22                                          | 0.00           |
|                        | <b>2009</b>           | 1.03                                  | 0.96                                          | 1.11                                          | 0.38           |
|                        | <b>2010</b>           | 1.04                                  | 0.97                                          | 1.11                                          | 0.32           |
|                        | <b>2011</b>           | 1.06                                  | 0.99                                          | 1.14                                          | 0.10           |
|                        | <b>2012</b>           | 1.07                                  | 0.99                                          | 1.14                                          | 0.08           |
|                        | <b>2013</b>           | 1.00                                  | 0.93                                          | 1.07                                          | 0.99           |
|                        | <b>2014</b>           | 1.00                                  |                                               |                                               |                |

*Notes:* ACO = Accountable Care Organization; CABG, coronary artery bypass grafting. Hospital-specific coefficients not shown.

**Supplemental Table 3.** Logistic Regressions of Hospital Inpatient Mortality among Admissions for AMI: ACOS without Stratification.

| <b>Effect</b>          | <b>Level</b>          | <b>Odds Ratio:<br/>Point Estimate</b> | <b>Lower<br/>95%<br/>Confidence<br/>Limit</b> | <b>Upper<br/>95%<br/>Confidence<br/>Limit</b> | <b>P-value</b> |
|------------------------|-----------------------|---------------------------------------|-----------------------------------------------|-----------------------------------------------|----------------|
| <b>ACO in 2011</b>     |                       | 1.00                                  | 0.91                                          | 1.09                                          | 0.98           |
| <b>ACO in 2012</b>     |                       | 1.00                                  | 0.91                                          | 1.09                                          | 0.94           |
| <b>ACO in 2013</b>     |                       | 1.03                                  | 0.94                                          | 1.13                                          | 0.52           |
| <b>ACO in 2014</b>     |                       | 1.07                                  | 0.98                                          | 1.17                                          | 0.12           |
| <b>Sex × Age group</b> | <b>Male × 65-69</b>   | 1.00                                  |                                               |                                               |                |
|                        | <b>Male × 70-74</b>   | 1.32                                  | 1.26                                          | 1.37                                          | 0.00           |
|                        | <b>Male × 75-79</b>   | 1.72                                  | 1.65                                          | 1.79                                          | 0.00           |
|                        | <b>Male × 80-84</b>   | 2.10                                  | 2.02                                          | 2.19                                          | 0.00           |
|                        | <b>Male × 85+</b>     | 2.88                                  | 2.78                                          | 2.99                                          | 0.00           |
|                        | <b>Female × 65-69</b> | 1.07                                  | 1.03                                          | 1.13                                          | 0.00           |
|                        | <b>Female × 70-74</b> | 1.34                                  | 1.28                                          | 1.40                                          | 0.00           |
|                        | <b>Female × 75-79</b> | 1.65                                  | 1.58                                          | 1.71                                          | 0.00           |
|                        | <b>Female × 80-84</b> | 1.97                                  | 1.89                                          | 2.05                                          | 0.00           |
|                        | <b>Female × 85+</b>   | 2.59                                  | 2.50                                          | 2.68                                          | 0.00           |
| <b>Intercept</b>       |                       | 0.05                                  | 0.05                                          | 0.06                                          | 0.00           |
| <b>Year</b>            | <b>2008</b>           | 1.24                                  | 1.21                                          | 1.28                                          | 0.00           |
|                        | <b>2009</b>           | 1.19                                  | 1.15                                          | 1.23                                          | 0.00           |
|                        | <b>2010</b>           | 1.16                                  | 1.12                                          | 1.20                                          | 0.00           |
|                        | <b>2011</b>           | 1.12                                  | 1.09                                          | 1.16                                          | 0.00           |
|                        | <b>2012</b>           | 1.08                                  | 1.05                                          | 1.12                                          | 0.00           |
|                        | <b>2013</b>           | 1.03                                  | 0.99                                          | 1.06                                          | 0.13           |
|                        | <b>2014</b>           | 1.00                                  |                                               |                                               |                |

Notes: ACO = Accountable Care Organization; AMI = acute myocardial infarction. Hospital-specific coefficients not shown.

**Supplemental Table 4.** Logistic Regressions of Hospital Inpatient Mortality among Admissions for Pneumonia: ACOs without Stratification.

| <b>Effect</b>          | <b>Level</b>          | <b>Odds Ratio:<br/>Point Estimate</b> | <b>Lower<br/>95%<br/>Confidence<br/>Limit</b> | <b>Upper<br/>95%<br/>Confidence<br/>Limit</b> | <b>P-value</b> |
|------------------------|-----------------------|---------------------------------------|-----------------------------------------------|-----------------------------------------------|----------------|
| <b>ACO in 2011</b>     |                       | 1.00                                  | 0.91                                          | 1.09                                          | 0.94           |
| <b>ACO in 2012</b>     |                       | 0.98                                  | 0.88                                          | 1.07                                          | 0.61           |
| <b>ACO in 2013</b>     |                       | 0.99                                  | 0.89                                          | 1.09                                          | 0.77           |
| <b>ACO in 2014</b>     |                       | 1.00                                  | 0.90                                          | 1.11                                          | 0.94           |
| <b>Sex × Age group</b> | <b>Male × 65-69</b>   | 1.00                                  |                                               |                                               |                |
|                        | <b>Male × 70-74</b>   | 1.12                                  | 1.07                                          | 1.17                                          | 0.00           |
|                        | <b>Male × 75-79</b>   | 1.31                                  | 1.26                                          | 1.37                                          | 0.00           |
|                        | <b>Male × 80-84</b>   | 1.51                                  | 1.45                                          | 1.57                                          | 0.00           |
|                        | <b>Male × 85+</b>     | 1.97                                  | 1.90                                          | 2.04                                          | 0.00           |
|                        | <b>Female × 65-69</b> | 0.76                                  | 0.72                                          | 0.79                                          | 0.00           |
|                        | <b>Female × 70-74</b> | 0.87                                  | 0.83                                          | 0.91                                          | 0.00           |
|                        | <b>Female × 75-79</b> | 1.07                                  | 1.03                                          | 1.12                                          | 0.00           |
|                        | <b>Female × 80-84</b> | 1.32                                  | 1.27                                          | 1.38                                          | 0.00           |
|                        | <b>Female × 85+</b>   | 1.82                                  | 1.75                                          | 1.88                                          | 0.00           |
| <b>Intercept</b>       |                       | 0.03                                  | 0.03                                          | 0.03                                          | 0.00           |
| <b>Year</b>            | <b>2008</b>           | 1.34                                  | 1.30                                          | 1.38                                          | 0.00           |
|                        | <b>2009</b>           | 1.29                                  | 1.25                                          | 1.33                                          | 0.00           |
|                        | <b>2010</b>           | 1.23                                  | 1.19                                          | 1.27                                          | 0.00           |
|                        | <b>2011</b>           | 1.18                                  | 1.15                                          | 1.22                                          | 0.00           |
|                        | <b>2012</b>           | 1.12                                  | 1.08                                          | 1.15                                          | 0.00           |
|                        | <b>2013</b>           | 1.08                                  | 1.05                                          | 1.12                                          | 0.00           |
|                        | <b>2014</b>           | 1.00                                  |                                               |                                               |                |

Notes: ACO = Accountable Care Organization. Hospital-specific coefficients not shown.

**Supplemental Table 5.** Logistic Regressions of Hospital Inpatient Mortality among Admissions for AAA Repair: ACOs Stratified by Leadership.

| Effect                              | Level          | Odds Ratio:<br>Point Estimate | Lower<br>95%<br>Confidence<br>Limit | Upper<br>95%<br>Confidence<br>Limit | P-value |
|-------------------------------------|----------------|-------------------------------|-------------------------------------|-------------------------------------|---------|
| Hospital or jointly led ACO in 2011 |                | 1.24                          | 0.76                                | 2.02                                | 0.38    |
| Hospital or jointly led ACO in 2012 |                | 0.94                          | 0.54                                | 1.62                                | 0.81    |
| Hospital or jointly led ACO in 2013 |                | 0.94                          | 0.52                                | 1.71                                | 0.84    |
| Hospital or jointly led ACO in 2014 |                | 1.40                          | 0.83                                | 2.34                                | 0.21    |
| Other-led ACO in 2011               |                | 0.96                          | 0.63                                | 1.46                                | 0.85    |
| Other-led ACO in 2012               |                | 1.07                          | 0.72                                | 1.59                                | 0.73    |
| Other-led ACO in 2013               |                | 0.80                          | 0.52                                | 1.25                                | 0.32    |
| Other-led ACO in 2014               |                | 0.91                          | 0.59                                | 1.40                                | 0.66    |
| Sex × Age group                     | Male × 65-69   | 1.00                          |                                     |                                     |         |
|                                     | Male × 70-74   | 1.22                          | 1.06                                | 1.40                                | 0.01    |
|                                     | Male × 75-79   | 1.26                          | 1.10                                | 1.45                                | 0.00    |
|                                     | Male × 80-84   | 1.78                          | 1.55                                | 2.05                                | 0.00    |
|                                     | Male × 85+     | 2.44                          | 2.11                                | 2.83                                | 0.00    |
|                                     | Female × 65-69 | 1.58                          | 1.28                                | 1.96                                | 0.00    |
|                                     | Female × 70-74 | 1.88                          | 1.57                                | 2.26                                | 0.00    |
|                                     | Female × 75-79 | 2.22                          | 1.88                                | 2.62                                | 0.00    |
|                                     | Female × 80-84 | 3.08                          | 2.62                                | 3.62                                | 0.00    |
| Female × 85+                        | 4.04           | 3.41                          | 4.79                                | 0.00                                |         |
| Intercept                           |                | 0.02                          | 0.02                                | 0.03                                | 0.00    |
| Year                                | 2008           | 1.60                          | 1.39                                | 1.83                                | 0.00    |
|                                     | 2009           | 1.45                          | 1.27                                | 1.67                                | 0.00    |
|                                     | 2010           | 1.43                          | 1.24                                | 1.64                                | 0.00    |
|                                     | 2011           | 1.20                          | 1.04                                | 1.39                                | 0.01    |
|                                     | 2012           | 1.19                          | 1.03                                | 1.37                                | 0.02    |
|                                     | 2013           | 1.11                          | 0.96                                | 1.29                                | 0.16    |
|                                     | 2014           | 1.00                          |                                     |                                     |         |

Notes: ACO = Accountable Care Organization; AAA = Abdominal Aortic Aneurysm. Hospital-specific coefficients not shown.

**Supplemental Table 6.** Logistic Regressions of Hospital Inpatient Mortality among Admissions for CABG: ACOs Stratified by Leadership.

| Effect                              | Level          | Odds Ratio:<br>Point Estimate | Lower<br>95%<br>Confidence<br>Limit | Upper<br>95%<br>Confidence<br>Limit | P-value |
|-------------------------------------|----------------|-------------------------------|-------------------------------------|-------------------------------------|---------|
| Hospital or jointly led ACO in 2011 |                | 1.12                          | 0.85                                | 1.49                                | 0.43    |
| Hospital or jointly led ACO in 2012 |                | 0.91                          | 0.67                                | 1.22                                | 0.51    |
| Hospital or jointly led ACO in 2013 |                | 1.13                          | 0.85                                | 1.50                                | 0.39    |
| Hospital or jointly led ACO in 2014 |                | 1.25                          | 0.94                                | 1.66                                | 0.12    |
| Other-led ACO in 2011               |                | 1.05                          | 0.86                                | 1.28                                | 0.64    |
| Other-led ACO in 2012               |                | 0.73                          | 0.58                                | 0.92                                | 0.01    |
| Other-led ACO in 2013               |                | 0.65                          | 0.50                                | 0.83                                | 0.00    |
| Other-led ACO in 2014               |                | 1.06                          | 0.86                                | 1.30                                | 0.60    |
| Sex × Age group                     | Male × 65-69   | 1.00                          |                                     |                                     |         |
|                                     | Male × 70-74   | 1.44                          | 1.34                                | 1.54                                | 0.00    |
|                                     | Male × 75-79   | 1.89                          | 1.77                                | 2.02                                | 0.00    |
|                                     | Male × 80-84   | 2.60                          | 2.42                                | 2.80                                | 0.00    |
|                                     | Male × 85+     | 3.40                          | 3.09                                | 3.74                                | 0.00    |
|                                     | Female × 65-69 | 1.58                          | 1.45                                | 1.71                                | 0.00    |
|                                     | Female × 70-74 | 2.07                          | 1.91                                | 2.23                                | 0.00    |
|                                     | Female × 75-79 | 2.88                          | 2.68                                | 3.10                                | 0.00    |
|                                     | Female × 80-84 | 3.71                          | 3.44                                | 4.00                                | 0.00    |
| Female × 85+                        | 4.29           | 3.87                          | 4.77                                | 0.00                                |         |
| Intercept                           |                | 0.02                          | 0.02                                | 0.02                                | 0.00    |
| Year                                | 2008           | 1.14                          | 1.06                                | 1.22                                | 0.00    |
|                                     | 2009           | 1.03                          | 0.96                                | 1.11                                | 0.38    |
|                                     | 2010           | 1.04                          | 0.97                                | 1.11                                | 0.33    |
|                                     | 2011           | 1.06                          | 0.99                                | 1.14                                | 0.10    |
|                                     | 2012           | 1.07                          | 0.99                                | 1.14                                | 0.08    |
|                                     | 2013           | 1.00                          | 0.93                                | 1.07                                | 0.99    |
|                                     | 2014           | 1.00                          |                                     |                                     |         |

Notes: ACO = Accountable Care Organization; CABG = coronary artery bypass grafting. Hospital-specific coefficients not shown.

**Supplemental Table 7.** Logistic Regressions of Hospital Inpatient Mortality among Admissions for AMI: ACOs Stratified by Leadership.

| Effect                              | Level          | Odds Ratio:<br>Point Estimate | Lower<br>95%<br>Confidence<br>Limit | Upper<br>95%<br>Confidence<br>Limit | P-value |
|-------------------------------------|----------------|-------------------------------|-------------------------------------|-------------------------------------|---------|
| Hospital or jointly led ACO in 2011 |                | 0.93                          | 0.80                                | 1.08                                | 0.33    |
| Hospital or jointly led ACO in 2012 |                | 0.94                          | 0.81                                | 1.09                                | 0.43    |
| Hospital or jointly led ACO in 2013 |                | 1.01                          | 0.87                                | 1.18                                | 0.85    |
| Hospital or jointly led ACO in 2014 |                | 1.12                          | 0.97                                | 1.31                                | 0.13    |
| Other-led ACO in 2011               |                | 1.04                          | 0.93                                | 1.15                                | 0.51    |
| Other-led ACO in 2012               |                | 1.03                          | 0.92                                | 1.14                                | 0.64    |
| Other-led ACO in 2013               |                | 1.04                          | 0.93                                | 1.15                                | 0.51    |
| Other-led ACO in 2014               |                | 1.05                          | 0.94                                | 1.17                                | 0.38    |
| Sex × Age group                     | Male × 65-69   | 1.00                          |                                     |                                     |         |
|                                     | Male × 70-74   | 1.32                          | 1.26                                | 1.37                                | 0.00    |
|                                     | Male × 75-79   | 1.72                          | 1.65                                | 1.79                                | 0.00    |
|                                     | Male × 80-84   | 2.10                          | 2.02                                | 2.19                                | 0.00    |
|                                     | Male × 85+     | 2.88                          | 2.78                                | 2.99                                | 0.00    |
|                                     | Female × 65-69 | 1.07                          | 1.03                                | 1.13                                | 0.00    |
|                                     | Female × 70-74 | 1.34                          | 1.28                                | 1.40                                | 0.00    |
|                                     | Female × 75-79 | 1.65                          | 1.58                                | 1.71                                | 0.00    |
|                                     | Female × 80-84 | 1.97                          | 1.89                                | 2.05                                | 0.00    |
| Female × 85+                        | 2.59           | 2.50                          | 2.68                                | 0.00                                |         |
| Intercept                           |                | 0.05                          | 0.05                                | 0.06                                | 0.00    |
| Year                                | 2008           | 1.24                          | 1.21                                | 1.28                                | 0.00    |
|                                     | 2009           | 1.19                          | 1.15                                | 1.23                                | 0.00    |
|                                     | 2010           | 1.16                          | 1.12                                | 1.20                                | 0.00    |
|                                     | 2011           | 1.12                          | 1.09                                | 1.16                                | 0.00    |
|                                     | 2012           | 1.08                          | 1.05                                | 1.12                                | 0.00    |
|                                     | 2013           | 1.03                          | 0.99                                | 1.06                                | 0.13    |
|                                     | 2014           | 1.00                          |                                     |                                     |         |

Notes: ACO = Accountable Care Organization; AMI = acute myocardial infarction. Hospital-specific coefficients not shown.

**Supplemental Table 8.** Logistic Regressions of Hospital Inpatient Mortality among Admissions for Pneumonia: ACOs Stratified by Leadership.

| Effect                              | Level          | Odds Ratio:<br>Point Estimate | Lower<br>95%<br>Confidence<br>Limit | Upper<br>95%<br>Confidence<br>Limit | P-value |
|-------------------------------------|----------------|-------------------------------|-------------------------------------|-------------------------------------|---------|
| Hospital or jointly led ACO in 2011 |                | 1.12                          | 0.96                                | 1.32                                | 0.15    |
| Hospital or jointly led ACO in 2012 |                | 1.15                          | 0.98                                | 1.36                                | 0.09    |
| Hospital or jointly led ACO in 2013 |                | 1.14                          | 0.96                                | 1.34                                | 0.13    |
| Hospital or jointly led ACO in 2014 |                | 1.03                          | 0.86                                | 1.23                                | 0.77    |
| Other-led ACO in 2011               |                | 0.94                          | 0.84                                | 1.06                                | 0.31    |
| Other-led ACO in 2012               |                | 0.90                          | 0.80                                | 1.01                                | 0.08    |
| Other-led ACO in 2013               |                | 0.92                          | 0.82                                | 1.04                                | 0.18    |
| Other-led ACO in 2014               |                | 1.00                          | 0.88                                | 1.13                                | 0.95    |
| Sex × Age group                     | Male × 65-69   | 1.00                          |                                     |                                     |         |
|                                     | Male × 70-74   | 1.12                          | 1.07                                | 1.17                                | 0.00    |
|                                     | Male × 75-79   | 1.31                          | 1.26                                | 1.37                                | 0.00    |
|                                     | Male × 80-84   | 1.51                          | 1.45                                | 1.57                                | 0.00    |
|                                     | Male × 85+     | 1.97                          | 1.90                                | 2.04                                | 0.00    |
|                                     | Female × 65-69 | 0.76                          | 0.72                                | 0.79                                | 0.00    |
|                                     | Female × 70-74 | 0.87                          | 0.83                                | 0.91                                | 0.00    |
|                                     | Female × 75-79 | 1.07                          | 1.03                                | 1.12                                | 0.00    |
|                                     | Female × 80-84 | 1.32                          | 1.27                                | 1.38                                | 0.00    |
| Female × 85+                        | 1.82           | 1.75                          | 1.88                                | 0.00                                |         |
| Intercept                           |                | 0.03                          | 0.03                                | 0.03                                | 0.00    |
| Year                                | 2008           | 1.34                          | 1.30                                | 1.38                                | 0.00    |
|                                     | 2009           | 1.29                          | 1.25                                | 1.33                                | 0.00    |
|                                     | 2010           | 1.23                          | 1.19                                | 1.27                                | 0.00    |
|                                     | 2011           | 1.18                          | 1.15                                | 1.22                                | 0.00    |
|                                     | 2012           | 1.12                          | 1.08                                | 1.15                                | 0.00    |
|                                     | 2013           | 1.08                          | 1.05                                | 1.12                                | 0.00    |
|                                     | 2014           | 1.00                          |                                     |                                     |         |

Notes: ACO = Accountable Care Organization. Hospital-specific coefficients not shown.
